# Supplementary material for: Poly(N-vinylpyrrolidone)–Laponite XLG Nanocomposite Hydrogels: Characterization, Properties and Comparison with Divinyl Monomer-Crosslinked Hydrogels
Source: MDPI journal article supplement (doi:10.3390/polym14194216), 2022-10-08
Supplement: s1 [file s1]

## Supplementary Data

### Poly(N-vinylpyrrolidone) - Laponite XLG nanocomposite hydrogels: characterization, properties and comparison with divinyl monomer- crosslinked hydrogels

Ionela Alice Podaru<sup>1,2,#</sup>, Paul O. Stanescu<sup>1,3,#</sup>, Raluca Ginghină<sup>4</sup>, Stefania Stoleriu<sup>5</sup>, Bogdan Trică<sup>6</sup>, Raluca Somoghi<sup>6,7</sup>, Mircea Teodorescu<sup>1,\*</sup>

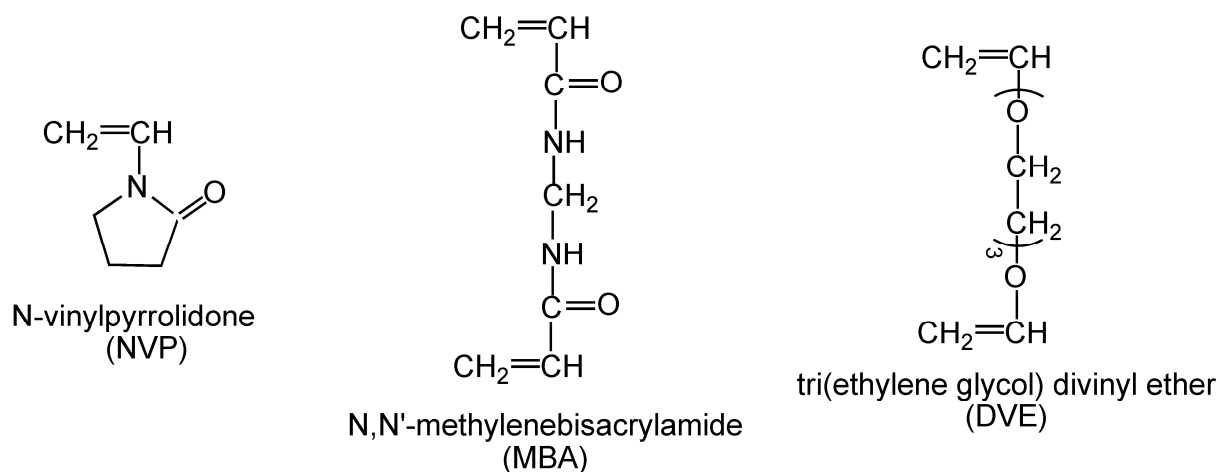

**Figure S1.** The chemical structures of the vinyl monomers used

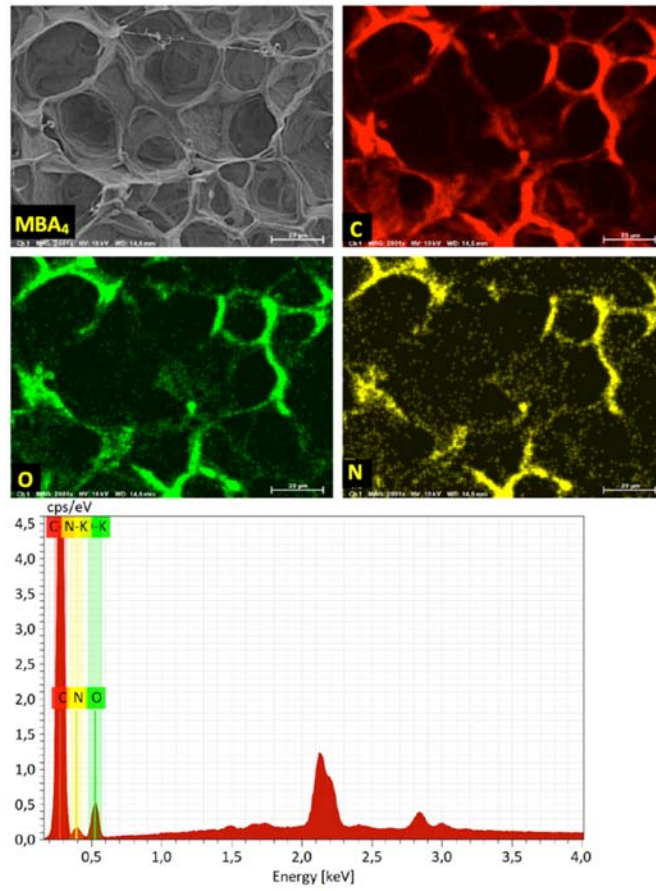

a)

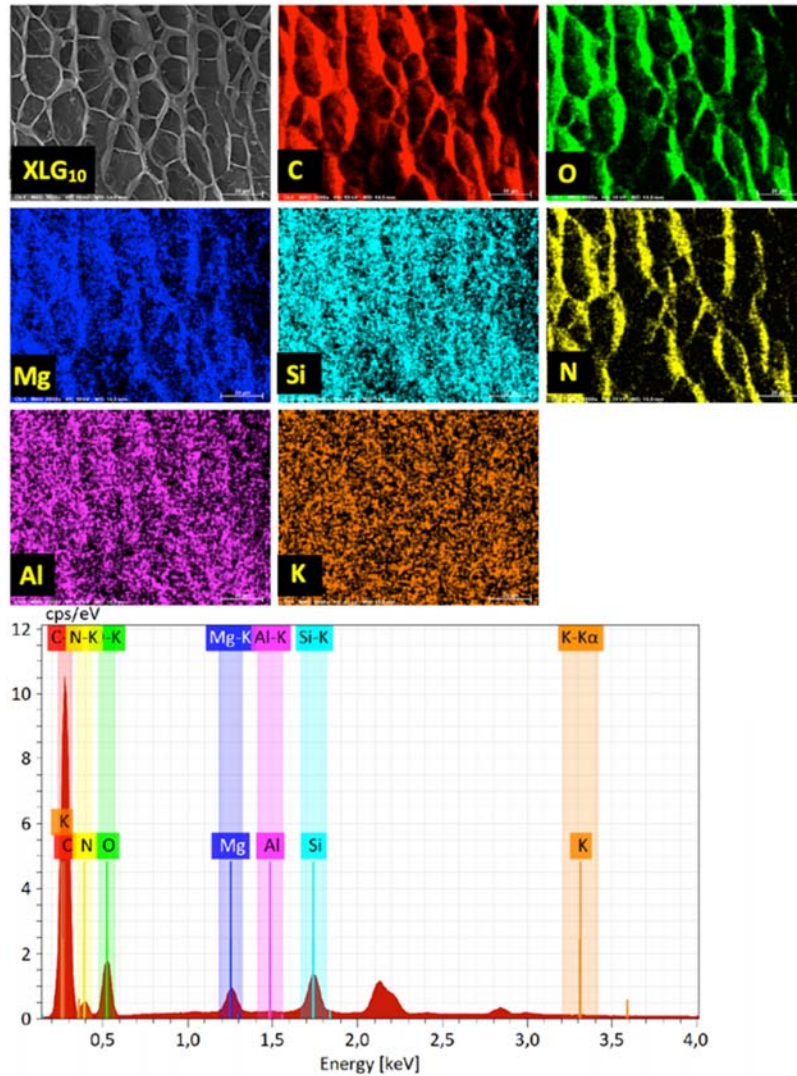

b)

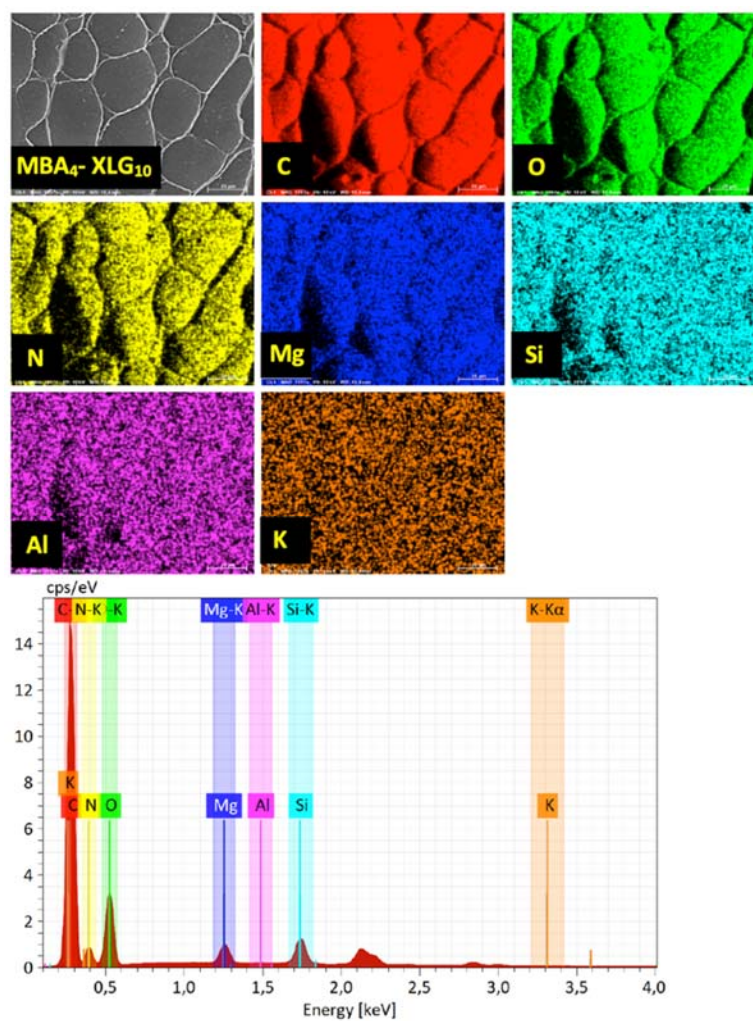

c)

**Figure S2.** EDX analyses of the of synthesized hydrogels. a) HMBA<sub>4</sub>; b) HXLG<sub>10</sub>; c) HMBA<sub>4</sub>-XLG<sub>10</sub>.

**Table S1.** Comparison between the storage ( $G'$ ) and compressive shear ( $G$ ) moduli of the synthesized hydrogels

| Modulus               | Hydrogel sample   |                   |                                      |                                      |                   |                    |                    |
|-----------------------|-------------------|-------------------|--------------------------------------|--------------------------------------|-------------------|--------------------|--------------------|
|                       | HMBA <sub>4</sub> | HDVE <sub>4</sub> | HMBA <sub>4</sub> -XLG <sub>10</sub> | HDVE <sub>4</sub> -XLG <sub>10</sub> | HXLG <sub>5</sub> | HXLG <sub>10</sub> | HXLG <sub>15</sub> |
| $G'$ (kPa)<br>at 1 Hz | 4.27±0.25         | 2.60±0.06         | 32.40±0.21                           | 10.96±0.18                           | 0.22±0.01         | 1.54±0.00          | 4.32±0.17          |
| $G$ (kPa)             | 6.63±0.24         | 3.04±0.35         | 38.55±1.69                           | 11.72±1.22                           | 0.49±0.06         | 1.89±0.05          | 5.57±0.26          |

**Table S2.** The  $E$  (elastic modulus)/ $G$  (shear modulus) ratios for the synthesized hydrogels

| Modulus   | Hydrogel sample   |                   |                                          |                                          |                   |                    |                    |
|-----------|-------------------|-------------------|------------------------------------------|------------------------------------------|-------------------|--------------------|--------------------|
|           | HMBA <sub>4</sub> | HDVE <sub>4</sub> | HMBA <sub>4</sub> -<br>XLG <sub>10</sub> | HDVE <sub>4</sub> -<br>XLG <sub>10</sub> | HXLG <sub>5</sub> | HXLG <sub>10</sub> | HXLG <sub>15</sub> |
| $E$ (kPa) | 22.35±0.81        | 10.26±0.120       | 129.99±5.71                              | 39.51±4.11                               | 1.66±0.19         | 6.38±0.16          | 18.79±0.87         |
| $G$ (kPa) | 6.63±0.24         | 3.04±0.35         | 38.55±1.69                               | 11.72±1.22                               | 0.49±0.06         | 1.89±0.05          | 5.57±0.26          |
| $E/G$     | 3.37              | 3.37              | 3.37                                     | 3.37                                     | 3.39              | 3.37               | 3.37               |

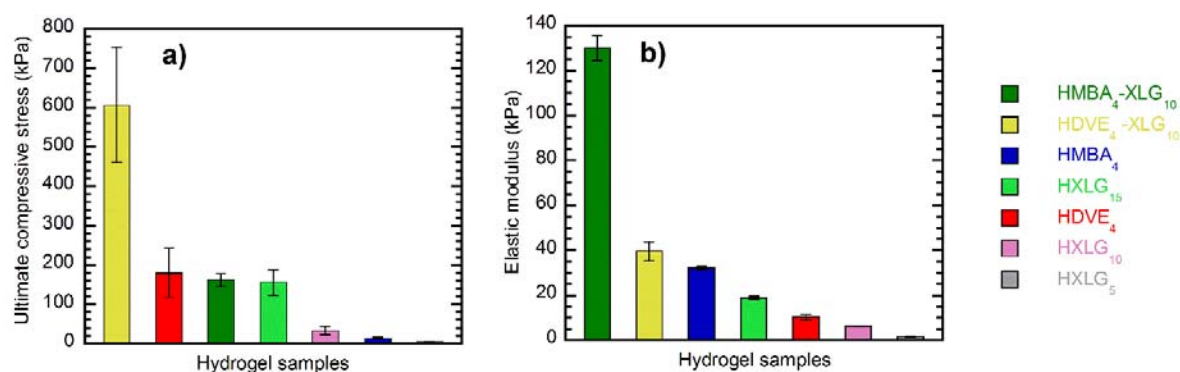

**Figure S3.** The descending order of the hydrogel samples from the point of view of a) ultimate compressive stress and b) elastic modulus.

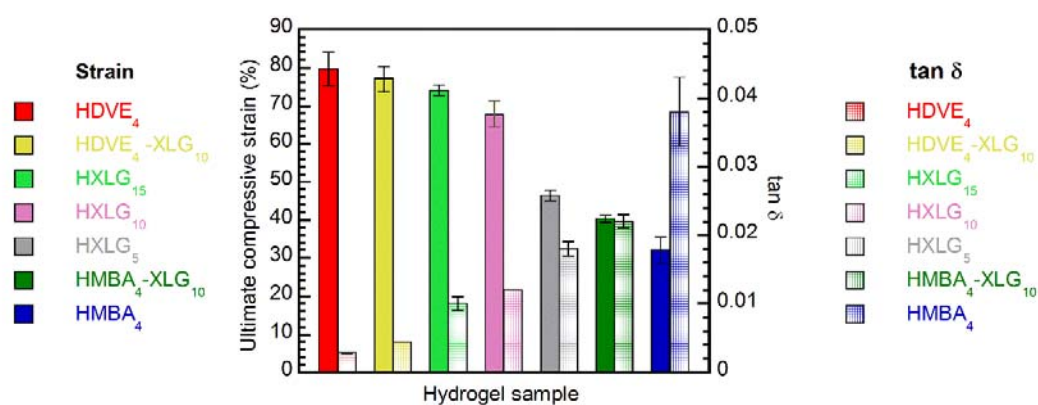

**Figure S4.** Comparison among the ultimate compressive strains and the loss factors of the synthesized hydrogels.
